# 1 Orienting to Polarized Light at Night—Matching 2 Lunar Skylight to Performance in a Nocturnal Beetle

3 James J. Foster<sup>1</sup>, John D. Kirwan<sup>1</sup>, Basil el Jundi<sup>2</sup>, Jochen Smolka<sup>1</sup>,  
4 Lana Khaldy<sup>1</sup>, Emily Baird<sup>1</sup>, Marcus J. Byrne<sup>3</sup>, Dan-Eric Nilsson<sup>1</sup>,  
5 Sönke Johnsen<sup>4</sup> & Marie Dacke<sup>1</sup>

6 <sup>1</sup>Lund Vision Group, Department of Biology, Lund University, Sölvegatan 35, 223 62 Lund, Sweden

7 <sup>2</sup>Biocenter (Zoology II), University of Würzburg, Am Hubland, 97074 Würzburg, Germany

8 <sup>3</sup>School of Animal, Plant and Environmental Sciences, University of the Witwatersrand, Wits 2050, South Africa

9 <sup>4</sup>Biology Department, Duke University, 130 Science Drive, Durham, NC 27708, USA

10 **Running title:** Polarized Lunar Skylight and Orientation

11 **Keywords:** polarization, sky compass, straight-line orientation, vision

12 **Corresponding author:** James Foster, [jjfoster86@gmail.com](mailto:jjfoster86@gmail.com)

## 13 **Summary Statement**

14 A degree-of-polarization threshold for orientation behaviour is  
15 reported for nocturnal dung beetle *Escarabaeus satyrus* in the context  
16 of measurements showing changes in the degree of polarization of  
17 skylight with lunar phase.

## 18 **Abstract**

19 For polarized light to inform behaviour, the typical range of degrees of  
20 polarization observable in the animal's natural environment must be  
21 above the threshold for detection and interpretation. Here we present  
22 the first investigation of the degree of linear polarization threshold for  
23 orientation behaviour in a nocturnal species, with specific reference to  
24 the range of degrees of polarization measured in the night sky. An  
25 effect of lunar phase on the degree of polarization of skylight was  
26 found, with smaller illuminated fractions of the moon's surface  
27 corresponding to lower degrees of polarization in the night sky. We  
28 found that South African dung beetle *Escarabaeus satyrus*  
29 (Boheman, 1860) can orient to polarized light for a range of  
30 degrees of polarization similar to that observed in diurnal insects,  
31 reaching a lower threshold between 0.04 and 0.32, possibly as low as  
32 0.06. For degrees of polarization lower than 0.23, as measured on a  
33 crescent moon night, orientation performance was considerably  
34 weaker than that observed for completely linearly-polarized stimuli,  
35 but was nonetheless stronger than in the absence of polarized light.

## 36 **Introduction**

37 Many animals use the sun or the moon to orient their movements  
38 (Papi & Pardi, 1963; Frisch, 1967; Schmidt-Koenig, 1990; Dacke

39 *et al.*, 2014). When the sun is not directly visible, its position can be  
40 estimated from the pattern of polarized skylight produced by  
41 Rayleigh scattering (Strutt, 1871) in the upper atmosphere. The use  
42 of these solar skylight polarization cues during daytime has been  
43 studied in numerous species (reviewed in: Wehner, 2001; Zeil *et al.*,  
44 2014), and similar behaviour has been shown to extend into twilight  
45 (Dacke *et al.*, 1999; Dacke *et al.*, 2003a; Freas *et al.*, 2017).  
46 Orientation to polarized lunar skylight has, to date, only been  
47 demonstrated in two species of night-active dung beetle found in  
48 southern Africa, *Scarabaeus zambesianus* and *Escarabaeus satyrus*  
49 (Dacke *et al.*, 2003b; Dacke *et al.*, 2004, Dacke *et al.*, 2011). These  
50 beetles sculpt a dung ball, which they roll away from the dung pat, to  
51 a distance where it can then be buried and consumed without  
52 interference from other beetles. In order to travel in a straight line,  
53 these species use celestial cues as compass references (Dacke  
54 *et al.*, 2011). In contrast to the closely related diurnal dung beetle  
55 *Kheper lamarcki*, *E. satyrus* orients to polarized light cues in  
56 preference to the observable position of the moon (el Jundi *et al.*,  
57 2015a) and may be specialised to detect the faint lunar skylight that  
58 emanates from a crescent moon (Smolka *et al.*, 2016).

### 59 ***Degree of Polarization of Lunar Skylight***

60 Linearly-polarized light, such as solar- and lunar skylight, is defined  
61 by two properties: its angle and degree of polarization. Both properties  
62 vary across the sky as a function of angular distance from the sun or  
63 moon, forming a pattern that indicates its position. The angle of  
64 polarization is the axis along which the greatest proportion of a  
65 light beam's electric field strength oscillates, while the degree of  
66 (linear) polarization is that beam's intensity in this axis as a proportion  
67 of the beam's total intensity. As a result, degree of polarization can be  
68 considered a measure of signal strength for an animal using the  
69 skylight pattern of angles of polarization as an orientation cue.  
70 Relative to the sun or moon's position, this angle-of-polarization  
71 pattern is similar across a range of conditions (Gál, *et al.*, 2001;  
72 Hegedüs *et al.*, 2007; Barta *et al.*, 2014; Wang *et al.*, 2016).  
73 In contrast, the degree of polarization decreases as a result of  
74 cloud cover and atmospheric turbidity (Labhart, 1999; Hegedüs *et al.*,  
75 2007; Wang *et al.*, 2016) as well as being affected by light pollution  
76 on moonlit nights in urban areas (Kyba *et al.*, 2011). Since  
77 lunar skylight is far dimmer than solar skylight, contributions to  
78 celestial light from other sources can reduce the  
79 maximum observable degree of polarization in the night sky, when  
80 these light sources have either a low degree of polarization (e.g.  
81 zodiacal light, integrated starlight, skyglow: Kyba *et al.*, 2011) or a  
82 malaligned angle-of-polarization pattern (e.g. solar skylight: Barta  
83 *et al.*, 2014). For *E. satyrus*, which relies heavily on skylight cues, a  
84 failure to detect such weakly-polarized skylight could mean failure to

85 orient, which in the worst case would result in returning to the high-  
86 competition region around the dung pile.

87 It has been suggested that the field cricket *Gryllus campestris* has  
88 adapted a low threshold (degree of linear polarization = 0.05) that  
89 permits the detection of the weakly polarized skylight often observed  
90 in its natural environment (Labhart, 1996, 1999). An assessment of  
91 the daytime skylight cues available near the crickets' collection site,  
92 using an artificial polarization-sensitive "neuron", suggested that  
93 degrees of polarization are typically quite low, as a result of haze and  
94 cloud cover, with median values of 0.13 and 0.23 in the solar and  
95 antisolar halves of the sky respectively (Labhart, 1999); as compared  
96 with values in excess of 0.60 measured in clear skies (Horváth *et al.*,  
97 2014). While the low intensity of lunar skylight presents a challenge  
98 for the detection of polarized skylight at night, the superposition eyes  
99 of *E. satyrus* are well adapted to detect lunar skylight cues, and they  
100 orient well even under very dim conditions (Dacke *et al.*, 2011;  
101 Smolka *et al.*, 2016). Nevertheless, if the combination of moonlight  
102 with other, unpolarized, celestial light results in weakly-  
103 polarized skylight, then *E. satyrus* would require a degree-of-  
104 polarization threshold that is low enough to match the typical range  
105 found in its geographic distribution.

#### 106 **Detection Thresholds for Polarization**

107 The thresholds for detection of polarized skylight previously estimated  
108 for insects have varied both between species and experimental  
109 paradigms. In a series of studies involving the field cricket  
110 *G. campestris* (Labhart, 1996; Henze & Labhart, 2007), elliptically-  
111 polarized light was used to investigate the degree of linear polarization  
112 (DoLP) threshold. The threshold for polarization-opponent  
113 interneurons in the optic lobes was estimated at DoLP = 0.05  
114 (Labhart, 1996). In behavioural experiments, reorientations of  
115 tethered walking crickets viewing a rotating stimulus with a degree of  
116 linear polarization as low as 0.03 were consistently greater than those  
117 measured for a circularly-polarized stimulus, though not  
118 significantly different after controlling for multiple testing (Henze &  
119 Labhart, 2007). Interestingly, neuronal responses to rotating  
120 elliptically-polarized light in the central brain of desert locust  
121 *Schistocerca gregaria* indicated a threshold as high as DoLP = 0.30  
122 (Pfeiffer *et al.*, 2011). The behavioural threshold reported for  
123 honeybees (*Apis mellifera*) is intermediate between the two examples  
124 given above. Bees were still observed to orient their "waggle dances"  
125 well to spots of skylight with degrees of polarization as low as 0.10  
126 (Frisch, 1967, p403–404), while dances for degrees of polarization  
127 >0.07 were described as "not completely disoriented".

128 In this study we investigated the polarization of lunar skylight across  
129 different lunar phases at field sites in South Africa near *E. satyrus*'  
130 typical range. We also tested the robustness of *E. satyrus*'  
131 orientation behaviour to decreases in the degree of  
132 linear polarization, allowing us to compare the beetle's  
133 behavioural threshold with the measured properties of lunar skylight.

## 134 **Methods**

### 135 ***Polarization Imaging of Skylight***

136 Lunar skylight is many orders of magnitude dimmer than its  
137 solar equivalent, making it more challenging to measure via  
138 photopolarimetry. The first published study of the polarization of  
139 lunar skylight used a series of images recorded through different  
140 polarizer orientations onto photographic film (Gál *et al.*, 2001), since  
141 commercially available charge-coupled device (CCD) sensors were  
142 deemed insufficiently sensitive at the time. Just a decade later, a dark-  
143 current-corrected CCD-based system was successfully employed to  
144 compare lunar skylight between urban and rural areas (Kyba *et al.*,  
145 2011), also following a serial-imaging protocol. Recently, interactions  
146 between solar- and lunar-skylight polarization were observed by  
147 comparing the untransformed signal from three separate  
148 CCD cameras (Barta *et al.*, 2014), each measuring a different angle of  
149 polarization, avoiding time-series artefacts. In this study we used a  
150 single camera with a complementary metal–oxide–semiconductor  
151 (CMOS) sensor, which was dark-corrected and calibrated to  
152 compensate for lens distortion and nonlinearities in CMOS chip  
153 sensitivity prior to estimation of polarization across the sky.

154 In order to assess the typical range of polarization states in  
155 lunar skylight, 'polarization images' of the sky were created for  
156 lunar phases ranging from full moon to new moon. Photographs were  
157 recorded at the game farm 'Stonehenge' (near Vryburg: 26°23'56"S,  
158 24°19'36"E) and at Thornwood Lodge (near Bela-Bela: 24°46'08"S,  
159 28°00'52"E), both in South Africa, at the Neusiedler See  
160 Biological Station (47°46'05"N 16°46'03"E) in Austria, and the  
161 Finnish Meteorological Institute Arctic Research Centre (67°21'60"N  
162 26°37'42"E) near Sodankylä, in Finland, using a digital camera (D810:  
163 Nikon Corp., Japan), fitted with a fisheye lens (Sigma 8 mm F3.5  
164 EX DG: Sigma Corp., Japan) and a filter holder (CA483-72: Sigma)  
165 with a polarizing filter (WR 72mm: Sigma). The system was previously  
166 calibrated to allow us to obtain an estimate of the absolute  
167 spectral radiance values for the red, green and blue channels (Nilsson  
168 and Smolka, in prep.). Moon fullness data for each night was retrieved  
169 from the U.S. Naval Observatory's website (<http://aa.usno.navy.mil/>).  
170 To create a single polarization image, 25 photographs were recorded:

171 One set of five photographs with the camera aimed directly at the  
172 zenith, and then one set each with the camera aimed at the horizon to  
173 the north, east, south and west. Between each image, the polarizer  
174 was rotated anti-clockwise (relative to the camera's viewing direction)  
175 by 45°, thus recording a set with the transmission axis at 0°, 45°, 90°,  
176 135° and 180° to its starting orientation (west–east when the camera  
177 faced the zenith and to the camera's right when it faced the horizon).

178 From the raw images, we calculated an estimate of absolute  
179 spectral radiance in the blue range of the visual spectrum. Images were  
180 then filtered to simulate a 4° half-width Gaussian filter to approximate  
181 the upper limit of visual resolution in *E. satyrus* (Nilsson and Smolka,  
182 in prep; Foster *et al.*, 2017). Polarization parameters were estimated  
183 for each direction by comparing the images taken at different filter  
184 orientations. An estimate of unpolarized intensity, in the absence of  
185 measurement error, may be calculated as the sum of the 0° and 90°  
186 images; or of the 45° and 135° images; or of the 90° and 180° images.  
187 The differences in radiance between the 0° and 90° images and the  
188 45° and 135° images were taken as Stokes parameters  $S_1$  and  $S_2$   
189 respectively, and the average of the sums of each pair was used to  
190 estimate total intensity (Stokes parameter  $S_0$ ). From these values the  
191 angle and degree of linear polarization were calculated for each pixel.  
192 Finally, we combined the images obtained for the different directions  
193 into a full hemispheric image by assigning each pixel the value of the  
194 directional image whose visual axis was closest, avoiding large off-axis  
195 viewing angles through the polarizer, and the associated  
196 intensity artefacts (Foster *et al.*, 2018), where possible.

## 197 ***Orientation to Polarized Light***

198 Beetle collection and the behavioural experiments were carried out at  
199 “Stonehenge”, 70 km North-West of Vryburg, North-West Province,  
200 South Africa. Beetles were kept in sand-filled boxes, where they were  
201 fed with cow dung *ad libitum*. Prior to each experiment, beetles were  
202 removed from their boxes and allowed to sculpt balls of cow dung and  
203 roll them with an unobstructed view of the moonlit sky. Experiments  
204 were conducted between the 11th and 15th of November, 2016, under  
205 clear conditions during which the fraction of the moon's illuminated  
206 surface visible ranged between 86% and 100%.

## 207 **Polarized light stimulus**

208 Stimulus light was provided by four UV-emitting 18W fluorescent bulbs  
209 (LT-T8 Blacklight Blue: NARVA Lichtquellen GmbH, Germany) in  
210 addition to eight ‘cool white’ LEDs (DDW-UJ2-TU1-1: Roithner  
211 LaserTechnik GmbH, Austria), because visible-spectrum light was  
212 found to be necessary to maintain beetle activity. The light source was  
213 directed through a stack of seven diffusing filters (Fig. 1 A), each  
214 constructed from white shading cloth (Euro-Serre shade: Willab AB,

215 Sweden) attached to a 6 mm-thick plate of UV-transmissive acrylic  
216 (Perspex, U.K.). For all conditions this stack also contained a polarizer  
217 (HNP'B: Polaroid Corp., U.S.A.). For the "unpolarized" and "maximally-  
218 polarized" conditions this stack was reconfigured to include a sheet of  
219 translucent drafting paper that acted as an additional diffuser  
220 (Fig. 1 B), but somewhat reduced the subsequent UV content of the  
221 stimulus. These diffusers allowed the reduction of the degree of  
222 linear polarization of the stimulus light without the introduction of  
223 elliptical polarization (as is the case when using a circular polarizer),  
224 which in some rare cases can be converted back to linearly polarized  
225 light in the animal's eye (Shurcliff, 1955; Chou *et al.*, 2008; Templin  
226 *et al.*, 2017). In this study we can therefore disregard elliptical  
227 polarization, and its potential conversion to linear polarization, and  
228 instead refer to degree of linear polarization (DoLP) as degree of  
229 polarization wherever it was manipulated or measured. A similar  
230 stimulus was used in a recent study to investigate the polarization threshold of aquatic springtail *Podura aquatica* (Egri *et al.*,  
231 2016).  
232

233 The intensity of each condition (Supplement S1.1) was measured from  
234 the position of the arena's centre using a calibrated irradiance probe  
235 (cosine corrector: CC-3-UV-T; light guide: P600-2-UV-VIS;  
236 spectrometer: QE65000; all produced by Ocean Optics Inc., Dunedin,  
237 USA). Polarization was measured at the same position using a UV-  
238 transmissive calcite linear polarizer (Glan-Thompson; GTH5M-A:  
239 Thorlabs GmbH, Germany) coupled to a spectrometer (FLAME-S-UV-  
240 VIS) via a light guide (P1000-2-UV-VIS; Ocean Optics). Spectra were  
241 recorded for four polarizer orientations in order to estimate Stokes  
242 parameters  $S_1$  and  $S_2$  (Foster *et al.*, 2018) and each measurement  
243 repeated ten times and averaged (Supplement S1.2) to minimise the  
244 effects of sensor noise (Tibbs *et al.*, 2018). Prior to Stokes parameter  
245 estimation, median spectrometer response for each  
246 polarizer orientation was weighted by the absorption spectrum of an  
247 insect photopigment with a maximum absorbance at 365 nm, calculated  
248 using the Stavenga template (Stavenga, 2010), and integrated across the  
249 region of the spectrum from 380–450 nm. This was done to limit the  
250 influence of regions of the spectrum for which the spectrometer received  
251 insufficient signal and those outside of the range detectable by a  
252 dung beetle UV-sensitive photoreceptor.

253 To ensure that minimally and maximally oriented behaviour were  
254 observed, stimuli for which no measurably polarized light reached the  
255 animal (DoLP  $\approx 0$ , "unpolarized"; UV irradiance 325–400 nm =  $8.5$   
256  $\times 10^{11}$  photons  $\text{cm}^{-2} \text{s}^{-1}$ ) or in which light was strongly-polarized and of  
257 equivalent brightness (DoLP = 0.99; "maximally-polarized";  
258 UV irradiance =  $3.4 \times 10^{11}$  photons  $\text{cm}^{-2} \text{s}^{-1}$ ), were produced (Fig. 1 B).  
259 Following this, stimuli with degrees of polarization of 0.32, 0.11, 0.04 at  
260 UV irradiances of 4.5, 9.0,  $4.6 \times 10^{11}$  photons  $\text{cm}^{-2} \text{s}^{-1}$ , respectively,

261 were tested. For each of these experiments, the filter stack was  
262 arranged so that it could be inverted and the order of the filters in the  
263 light path reversed. As a consequence, when the filter stack was  
264 arranged to produce a polarized stimulus, it could be rapidly inverted  
265 between trials to produce a degree of polarization of  $<0.02$  (at UV-  
266 irradiances 9.0, 4.5, 8.9  $\times 10^{11}$  photons  $\text{cm}^{-2} \text{s}^{-1}$  respectively). This  
267 alternation occurred after every second individual, so that each  
268 individual experienced either a “polarized” or “control” condition.

## 269 **Orientation Experiments and Analysis**

270 For each experiment, beetles were allowed to roll a dung ball to the  
271 edge of a 50 cm diameter circular arena, where its bearing was noted.  
272 Once the stimulus had been rotated by  $90^\circ$ , each beetle was then  
273 replaced at the centre of the arena and allowed to roll to the edge a  
274 second time. The angle between these two headings, with the  $90^\circ$   
275 rotation of the stimulus subtracted, was taken as a measure of  
276 orientation error. In this formulation a perfectly-oriented individual,  
277 orienting using polarization alone, would produce an orientation error  
278 of  $0^\circ$ . Because the response of a polarization-sensitive photoreceptor  
279 to a given angle of polarization follows a  $180^\circ$  periodicity, accurate  
280 orientation under this scenario is expected to follow an axial-  
281 bimodal pattern, with some well-oriented individuals changing their  
282 heading by  $180^\circ$ . All statistical tests and modelling were thus performed  
283 using doubled angles, to account for the axial-bimodal nature of this  
284 data (Batschelet, 1981). Following this transformation, V tests were  
285 used to test for (non-uniform) axial orientation error, with an expected  
286 mean of  $0^\circ$ , and Watson  $U^2$  tests were used to compare orientation  
287 between the polarized and control conditions.

## 288 **Results**

### 289 ***Skylight Polarization across Lunar Phases***

290 We found that gibbous moon skylight (93–98% fullness; Fig. 2 A–B)  
291 measured in rural South Africa reached degrees of polarization as high  
292 as 0.6–0.7, similar to values reported for sunlit skies (Berry *et al.*, 2004;  
293 Horváth *et al.*, 2014) but much greater than the levels, around 0.27, for  
294 lunar skylight measured in Europe (Supplement S2.1 A; 80%  
295 illuminated). We also found that the maximum degree of polarization  
296 for other lunar phases was lower, with degree of polarization  
297 corresponding to moon fullness (Fig. 2 G). When the moon was close  
298 to the horizon, modal degrees of polarization within  $60^\circ$  of the zenith  
299 were 0.43 for an intermediate fullness (two days before last quarter:  
300 80% illuminated) and 0.23 for a crescent moon (20% illuminated).  
301 Modal degrees of polarization measured during a moonless and an  
302 overcast night with a gibbous moon (67% illuminated) were around  
303 0.06 and 0.08 respectively. Though the movements of a few stars and

304 planets across the image set produced small regions with artificially  
305 high (false) “degrees of polarization”, measured degrees were very low  
306 across most of the sky in the absence of lunar skylight. The lack of  
307 alignment of the angles of polarization in adjacent sky regions  
308 (Supplement S2.2 E–F) suggests that non-zero values result from  
309 measurement error, rather than true sources of  
310 atmospheric polarization (e.g. airglow and light pollution on the clear  
311 night and transmitted lunar skylight on the overcast night).

## 312 **Orientation Behaviour**

313 For the highest degree of polarization (DoLP = 0.99) beetles were well  
314 oriented in an axial-bimodal distribution (axial mean vector length:  $\rho =$   
315  $0.519$ ; mean angle:  $\mu = 14.4^\circ$  and  $194.4^\circ$ ) consistent with previous  
316 observations for this species when presented with artificial  
317 polarized stimuli (el Jundi *et al.*, 2015a). For degrees of polarization  
318 greater than 0.04 beetles were significantly oriented (DoLP = 0.99:  
319  $v = 0.455$ ,  $p < 0.001$ ; DoLP = 0.32:  $v = 0.328$ ,  $p = 0.002$ ) or show some  
320 indication of orientation (DoLP = 0.11:  $v = 0.152$ ,  $p = 0.087$ ), although  
321 the distribution was only significantly different from the control for  
322 degrees of polarization greater than 0.11 (DoLP = 0.99:  $U^2 = 0.370$ ,  
323  $p < 0.01$ ; DoLP = 0.032:  $U^2 = 0.233$ ,  $p < 0.05$ ).

324 The difference in the concentration of the axial distribution of  
325 heading changes (Fig. 3) as a function of degree of polarization was  
326 notable, with each decrease in the degree of polarization producing a  
327 corresponding decrease in axial mean vector length ( $\rho_{0.99} = 0.488$ ,  
328  $\rho_{0.32} = 0.351$ ,  $\rho_{0.11} = 0.1552$ ,  $\rho_{0.04} = 0.071$ ). To investigate this effect  
329 further, we modelled changes in the concentration parameter of a  
330 von Mises distribution,  $\kappa$ , as a function of degree of polarization  
331 (Fig. 4). Following initial inspection of the trend, as well as previous  
332 studies of the relationship between degree of polarization and  
333 response strength (e.g. Labhart, 1996; Glantz and Schroeter, 2006),  
334 we chose a log-linear relationship between  $\kappa$  and degree of  
335 polarization:  $\kappa = \beta \log_{10}(\text{DoLP})$ . The base ten was chosen for  
336 straightforward examination of the relationship, such that a slope of 1  
337 would indicate a tenfold increase in orientation precision between  
338 degrees of polarization of 0.099 and 0.99 (corresponding roughly to the  
339 lowest and highest values for which oriented behaviour was observed).  
340 A Bayesian generalised linear model was implemented in the Stan  
341 language (Carpenter *et al.*, 2017), using the package brms 2.3.1  
342 (Bürkner, 2017) in R 3.5.0 (R Core Team, 2018). The fitted model had  
343 the formula,  $\kappa = 0.05 + 0.52x$ , where  $x = \log_{10}(\text{DoLP}) - \log_{10}(0.02)$  to  
344 safeguard against negative estimates of  $\kappa$ . This model also suggests  
345 that beetles remained oriented for degrees of polarization greater than  
346 0.11 (Fig. 4), but extrapolating further indicates that polarization may  
347 contribute somewhat to orientation performance for degrees of  
348 polarization greater than 0.06: the intersection point of the model’s 95%



349 credible interval (Fig. 4: red shaded area) and the 95% credible interval  
350 of a model fitted to the control condition alone (Fig. 4: blue shaded  
351 area). Taken together, our sky measurements and behavioural data  
352 suggest that the degree of polarization of lunar skylight during a  
353 crescent moon may be close to the threshold for oriented behaviour.

## 354 Discussion

### 355 ***Polarization of Lunar Skylight***

356 On all moonlit nights the highest degree of polarization was measured  
357 in a band at approximately 90° from the moon (Fig. 2), mimicking that  
358 of the sunlit sky (Berry *et al.*, 2004; Horváth *et al.*, 2014), as found for  
359 previous studies of the polarization of lunar skylight (Gál *et al.*, 2001;  
360 Kyba *et al.*, 2011; Barta *et al.*, 2014; Tang *et al.*, 2016). Although the  
361 serial-imaging protocol we employed can lead to the accumulation of  
362 motion artefacts, particularly during long exposures, these effects  
363 appeared to be limited, for the most part, to a small number of bright  
364 stars (Fig. 2 E) and brightly-lit cloud edges (Fig. 2 F) in the absence  
365 of lunar skylight. Our results indicate both that lunar skylight can be  
366 nearly as polarized as solar skylight (DoLP  $\geq 0.6$ ) and that its  
367 degree of polarization is modulated by lunar phase. One previous  
368 study of lunar skylight polarization also reported a lower maximum  
369 degree of polarization for a gibbous moon than a full moon  
370 (72% illuminated: DoLP  $\approx 0.15$ ; 78% illuminated: DoLP  $\approx 0.13$ ; 100%  
371 illuminated: DoLP  $\approx 0.25$ ; Barta *et al.*, 2014). Since the intensity of  
372 lunar skylight corresponds to the fraction of the moon's illuminated  
373 surface observable (approximated as spectral irradiance =  $1 -$   
374  $[\cos(\text{illuminated fraction} \times \pi/2)]^{0.29}$ ; Palmer & Johnsen, 2015;  
375 Kieffer & Stone, 2005), we propose that any reduction in the intensity  
376 of polarized lunar skylight relative to the intensity of other light sources  
377 usually decreases the degree of polarization of celestial light, which is  
378 a composite of the two.

379 In general, the degrees of polarization in South African night skies  
380 reported here are greater than those reported in previous studies  
381 conducted in central Europe ( $0.36 \pm \sigma 0.02$ , Elstal, Germany: Kyba  
382 *et al.*, 2011;  $\bar{x}_{\text{astronomical night}} = 0.10\text{--}0.35$ , Szombathely, Hungary: Barta  
383 *et al.*, 2014). The two sites in South Africa at which we measured  
384 lunar skylight were at higher altitudes (Vryburg: 1202 m, Bela-Bela:  
385 1137 m), have a semi-arid climate and low light pollution, all of which  
386 may play a role in permitting strongly-polarized lunar skylight to reach  
387 a terrestrial observer unhindered and undiluted. Using the same  
388 method in central Europe produced similar estimates of degree of  
389 polarization to those found in previous studies (mode = 0.27, Illmitz,  
390 Austria: Supplement S2.1 A).

391 Clear-sky polarization patterns can be predicted as a function of  
392 atmospheric turbidity and wavelength (e.g. Wang *et al.*, 2016). When  
393 atmospheric turbidity is low—for example, as a result of low  
394 concentrations of water droplets—the degree of polarization of  
395 skylight is greater, but is lower in the UV wavelengths than in the blue,  
396 the former of which *E. satyrus* are thought to use to detect  
397 polarized light (el Jundi *et al.*, 2015a, 2016). Since our analysis  
398 focussed on the camera’s ‘blue’ channel (full-width at half maximum  
399 of sensitivity: 420–505 nm) it is possible that we do indeed  
400 overestimate the degree of polarization available to a dung beetle.  
401 The UV content of a moonlit sky may be lower than the equivalent  
402 proportion for sunlight ( $\sim 14\%$   $\text{photons}_{350-400\text{ nm}}:\text{photons}_{400-450\text{ nm}}$ ,  
403 calculated from: Johnsen *et al.*, 2006), while other sources of  
404 celestial light, such as airglow (Benn & Ellison, 1998) and starlight  
405 (Johnsen *et al.*, 2006) have more similar intensities in the blue and  
406 UV regions. Future studies could use a combination of  
407 polarimetric spectroscopy and photopolarimetry to more accurately  
408 determine how wavelength, turbidity and lunar phase interact to  
409 produce different degrees of polarization of lunar skylight, and how  
410 this might impact nocturnal and crepuscular insects that detect  
411 polarization in either the UV or blue regions of the spectrum. This may  
412 be of particular importance given the recent dramatic increases in the  
413 intensity of skyglow from anthropogenic light pollution (Falchi *et al.*,  
414 2016) and its potential to reduce the degree of polarization of  
415 lunar skylight (Kyba *et al.*, 2011) below the detection thresholds for  
416 dung beetles and other nocturnal and crepuscular arthropods that  
417 may orient using polarized lunar skylight.

#### 418 **Polarization Sensitivity Thresholds**

419 For this study, we expanded the analysis methods used for neuronal  
420 recordings in crickets (Labhart, 1996) and locusts (Pfeiffer *et al.*,  
421 2011) to fit response curves to circular concentration of (re-  
422 )orientation behaviour. We report an estimated threshold for  
423 orientation behaviour in *E. satyrus* at between degrees of polarization  
424 of 0.04–0.32, modelled at 0.06, under dim-light conditions, which is  
425 broadly comparable to those found for other insects in daylight (0.05  
426 for *G. campestris*: Labhart, 1996; Henze & Labhart, 2007; 0.10 for  
427 *A. mellifera*: Frisch, 1967; 0.30 for *S. gregaria*: Pfeiffer *et al.*, 2011).  
428 *E. satyrus* orients to skylight both during the full moon, when skylight  
429 remains bright throughout the night, and when only a thin crescent of  
430 the moon’s surface is illuminated, providing dim lunar skylight for a  
431 brief period directly after dusk or before dawn (Smolka *et al.*, 2016).  
432 The compass neurons in *E. satyrus*’ central complex have been  
433 shown to weight the predominant angle of polarization (a proxy for the  
434 skylight polarization pattern) more strongly than the position of a  
435 light spot (such as the sun or moon), in contrast to diurnal dung beetle  
436 *K. lamarcki*, which weights the light spot’s position more strongly

437 (el Jundi *et al.*, 2015a). *K. lamaracki* is thought to combine  
438 information from multiple skylight cues, including intensity gradients  
439 (el Jundi *et al.*, 2014) and spectral gradients (el Jundi *et al.*, 2015b,  
440 2016), and *E. satyrus* may also rely on a combination of skylight cues  
441 when the moon becomes obscured. It is possible that, to achieve the  
442 impressive orientation precision observed on nights lit by a  
443 crescent moon (Smolka *et al.*, 2016), *E. satyrus* builds on the  
444 performance observed here for polarization cues in isolation by  
445 integrating information from multiple skylight cues.

#### 446 **Threshold Analysis**

447 In our behavioural experiments, we observed an increase in  
448 orientation accuracy as a function of degree of linear polarization,  
449 from which we derive our estimate of *E. satyrus*'  
450 polarization threshold. We note, however, that methods for defining a  
451 polarization threshold have varied somewhat across the literature. In  
452 *G. campestris*, the threshold for electrophysiological recordings was  
453 defined as the point at which firing-rate modulation was above the  
454 95% confidence interval for responses to circularly-polarized light  
455 (DoLP = 0) and darkness (Labhart, 1996), whereas for behavioural  
456 experiments walking direction modulations were compared non-  
457 parametrically with the circularly-polarized control. Firing-rate  
458 modulation was also calculated for *S. gregaria*, but the mean vector  
459 length derived from these values was instead chosen for comparison  
460 with a circularly-polarized control, again identifying a threshold at the  
461 condition for which all recordings were outside of the 95% confidence  
462 interval (Pfeiffer *et al.*, 2011)<sup>1</sup>. In each case, these definitions avoided  
463 implying orientation capacity for conditions where responses to  
464 polarized and unpolarized light were at all similar, but did not take  
465 trends across the dataset as a whole into account (although  
466 regression models were reported: Labhart, 1996; Pfeiffer *et al.*,  
467 2011). In this study we attempt to use this trend to inform our estimate  
468 for the point where the credible intervals for responses to polarized  
469 and unpolarized light diverge. This definition allows us to extrapolate  
470 from our data, proposing a minimum degree of polarization at which  
471 any facilitation of orientation could occur, which is a form of  
472 'threshold'. Nevertheless, definitions based on confidence intervals,  
473 either explicitly or through statistical null-hypothesis testing (including  
474 the  $v$  tests and Watson  $U^2$  tests reported here), are liable to change  
475 with increasing sample size.

476 Future work might benefit from the fitting of a psychometric curve for  
477 responses to polarized stimuli (e.g. Temple *et al.*, 2015). This type of

---

<sup>1</sup> Although we use a similar method to identify the threshold, we found the 95% credible interval for mean vector lengths to be asymmetric around its centre (Fig. 4, blue area and blue line) and therefore used this region rather than a symmetric Gaussian 95% confidence interval.

478 model asymptotically approaches both the baseline rate of response,  
479 when there is no stimulus, and the maximum rate of response,  
480 beyond which increases in stimulus strength produce only  
481 infinitesimal increases in response strength. The inflection point of  
482 such a curve may be taken as an estimate of threshold (Knoblauch &  
483 Maloney, 2012; Houpt & Bittner, 2018). This has the advantage that  
484 it does not compound uncertainty in the positions of both the baseline  
485 of the response curve and its slope. Such methods have not yet been  
486 developed for circular data, although analogous measures have been  
487 used in a few recent studies (Foster *et al.*, 2017; Kirwan, 2018).

#### 488 **Detection Limits**

489 While behavioural thresholds can indicate what conditions would  
490 allow animals to use polarized light in nature, they do not necessarily  
491 represent a true detection threshold in the sense of the  
492 visual system's physiological limits. Animals may continue to detect  
493 polarized light, but discard the information, or weight it more weakly  
494 compared to other cues. Inhibition of responses to weakly-polarized  
495 light may be adaptive for skylight-orienting insects. For a  
496 polarization compass to aid in identifying the sun's true position, the  
497 angle-of-polarization pattern of the sky as a whole must be integrated  
498 and combined with information about time of day. This would require  
499 an internal representation of the angle-of-polarization pattern that  
500 changes over the day, as has been demonstrated for the tunings of  
501 neurons in the central brain of locusts (Pfeiffer & Homberg, 2007;  
502 Bech *et al.*, 2014). Evidence from both locusts (Bech *et al.*, 2014) and  
503 honeybees (Rossel & Wehner, 1984) indicates that this  
504 representation best matches solar skylight in the high degree-of-  
505 polarization band 90° from the sun, where angles of polarization in  
506 adjacent sky regions are most aligned. It has therefore been  
507 suggested that weakly-polarized regions could be excluded from the  
508 sun-compasses of some species (Rossel & Wehner, 1984; Pfeiffer  
509 *et al.*, 2011), since they may correspond to the regions that are poorer  
510 matches to this simplified internal representation of the angle-of-  
511 polarization pattern.

512 Bernard & Wehner (1977) proposed that the sensitivity ( $S$ ) of a  
513 photoreceptor to a beam of light illuminating it should be proportional  
514 to,

$$515 \quad S = 1 + \frac{d(S_p - 1)}{S_p + 1} \cos(2\phi - 2\phi_{\max}), \quad (1)$$

516 where  $d$  is the degree of linear polarization of the beam,  $\phi_{\max}$  is the  
517 angle of polarization ( $\phi$ ) to which the photoreceptor is maximally  
518 sensitive, and polarization sensitivity,  $S_p$  is the response to  $\phi_{\max}$   
519 divided by the response to  $\phi_{\max} \pm 90^\circ$  if  $d = 1$ . When the response  
520 (resulting from  $S$ ) is sufficiently distinct from the response to  
521 unpolarized light, it should be possible for an eye containing

522 photoreceptors sensitive to different angles of polarization to detect  
523 and interpret polarized light. To meet this requirement: i.)  $S_p$  must be  
524 greater than one, ii.)  $d$  must be sufficiently large, iii.) the beam must  
525 be bright enough for modulation as a function of  $\phi$ ,  $d$  and  $S_p$  to be  
526 distinguishable from sources of noise. In general, the influence of the  
527 angle of polarization ( $\phi$ ) might be reasonably discounted for  
528 hymenopterans and ball-rolling dung beetles, which often perform  
529 complete body axis rotations when commencing  
530 orientation behaviour. In this study we focussed on requirement (ii):  
531 that degree of polarization must be sufficiently large, taking orientation  
532 to completely linearly-polarized light as indicative that requirements  
533 (i.) and (iii.) were met.

534 The blue-sensitive dorsal rim photoreceptors of *G. campestris* have  
535 mean polarization sensitivity of  $S_p = 8.3$  (Labhart *et al.*, 1984), which  
536 would suggest that at threshold there is only a 2–4% difference  
537 ( $d = 0.03$ – $0.05$ ) between sensitivity to unpolarized and partially-  
538 polarized light. For the dorsal rim UV-receptors of *A. mellifera*, mean  
539 polarization sensitivity is  $S_p \approx 5$  (Menzel & Snyder, 1974), indicating a  
540 difference around threshold of 5–7% ( $d = 0.07$ – $0.10$ ). By contrast, a  
541 similar modal value of  $S_p \approx 8.5$  for the dorsal rim blue receptors of  
542 *S. gregaria* indicates that this difference is 24% at threshold ( $d =$   
543  $0.30$ ). Somewhat larger values of  $S_p = 15.1$  and  $S_p = 7.7$ – $12.9$  were  
544 reported for dorsal rim UV receptors of diurnal and crepuscular  
545 dung beetles *Pachysoma striatum* (Dacke *et al.*, 2002) and  
546 *S. zambesianus* (Dacke *et al.*, 2004), respectively, and assuming  
547 similar values for *E. satyrus* would give a difference of 5–9% ( $d =$   
548  $0.06$ – $0.11$ ) around threshold. Considering the relatively  
549 small increases in sensitivity required to elicit oriented behaviour, it is  
550 plausible that the performance of the visual systems of *G. campestris*,  
551 *A. mellifera* and *E. satyrus* are noise-limited at threshold, while that of  
552 *S. gregaria* appears to be inhibited by some other process.  
553 Nevertheless, since no photoreceptor recordings are currently  
554 available for *E. satyrus*, we cannot exclude the possibility that these  
555 beetles may detect but disregard degrees of polarization that fall  
556 outside the range found in the moonlit skies observable in their natural  
557 habitat.

558 Nocturnal and diurnal species might also face different constraints in  
559 the detection of polarized skylight. Many nocturnal species (such as  
560 *E. satyrus*) or species active during both day and night (such as  
561 *G. campestris*) pool visual signals from adjacent regions (Warrant,  
562 1999) to increase signal-to-noise ratios through larger absolute  
563 photon catches. Such spatial pooling could lead to the combination of  
564 signals from regions with malaligned angles of polarization, and of  
565 high degree of polarization and low degree of polarization regions,  
566 reducing the maximum observable degrees of polarization while  
567 enabling more robust detection of dim skylight polarization patterns.

568 The stimuli used in this study were 2–3 orders of magnitude dimmer  
569 than those used in most previous studies (Labhart, 1996; Pfeiffer  
570 *et al.*, 2011; el Jundi *et al.*, 2014), although they remain 1–3 orders of  
571 magnitude brighter than the UV component of a moonlit sky (Johnsen  
572 *et al.*, 2006: Supplement S1.1). Light intensities used in this study are  
573 most similar to those for the ‘stimulus size’ experiment performed with  
574 *G. campestris* (Henze & Labhart, 2007), in which an opaque annulus  
575 surrounded a 1° diameter completely linearly-polarized stimulus (to  
576 which the crickets successfully oriented). *G. campestris* is active  
577 during both day and night, and it is possible that their impressive  
578 polarization sensitivity also allows them to orient to  
579 polarized moonlight as *E. satyrus* does. In this initial study to  
580 investigate the effects of degree of polarization on  
581 orientation accuracy in dung beetles, we have not addressed the third  
582 condition outlined above: that detection of polarization can only occur  
583 when polarized light is sufficiently bright. To more accurately define  
584 the limits for a beetle’s skylight compass, future studies should  
585 compare orientation performance across the full light-intensity and  
586 degree-of-polarization range of lunar skylight. Such information could  
587 help to predict how anthropogenic pollution can affect nocturnal  
588 arthropods, and aid in the development of solutions to mitigate them.

## 589 **Conclusions**

590 The nocturnal dung beetle *Escarabaeus satyrus* (Boheman, 1860)  
591 has previously been demonstrated to orient to polarized lunar skylight  
592 throughout the lunar month, and appears well adapted to detect dim  
593 lunar skylight. In darkroom experiments employing dim  
594 polarized stimuli with a range of degrees of polarization, we find that  
595 *E. satyrus* remains oriented across a range similar to that reported for  
596 diurnal insects, reaching a threshold between 0.04 and 0.32, possibly  
597 as low as 0.06. We also provide measurements of the variation in  
598 degree of polarization of lunar skylight across different lunar phases,  
599 recorded in *E. satyrus*’ natural habitat.

## 600 **Author Contributions**

601 JJF, BeJ, EB and MD conceptualised the study and designed the  
602 behavioural experiments. JJF, BeJ, LK, EB, MJB and MD carried out the  
603 behavioural experiments. JJF and JS devised the polarization-imaging protocol, and JS  
604 and DE-N conceptualised and designed the sky-imaging system. JS designed the  
605 polarization-analysis software. JDK and SJ conceptualised the statistical analysis and  
606 JDK designed and carried out the statistical modelling. JJF drafted the manuscript and  
607 all authors revised the manuscript.

## 608 Acknowledgements

609 The authors thank Ted and Winnie Harvey of Stonehenge game farm, and Riitta Aikio  
610 and Markku Ahponen at the FMI Sodankylä-Pallas Arctic Research Centre for their help  
611 in the field, and Therése Reber in particular for braving high towers and long Arctic  
612 winter nights to obtain measurements. We would also like to thank Camilla Sharkey for  
613 advice regarding beetle spectral sensitivity and David O'Carroll for providing the  
614 drafting-paper diffuser. We dedicate this paper to the memory of Ted Harvey, whose  
615 help, patience and ingenuity have proven vital to the past decade of dung beetle  
616 orientation research, and who will be sorely missed.

## 617 Competing Interests

618 The authors declare no competing interests.

## 619 Funding

620 JJF has received funding from INTERACT Transnational Access (Arctic Night Skies as  
621 an Orientation Cue, awarded to JJF & MD), the Wallenberg Foundation, Carl Trygger's  
622 Foundation for Scientific Research (15:108) and the Lars-Hiertas Minne Foundation  
623 (FO2015-40) over the course of this project. MD is grateful for funding from the Swedish  
624 Science Foundation (VR 2014-4623).

## 625 References

- 626 **Barta, A., Farkas, A., Száz, D., Egri, Á., Barta, P., Kovács, J., Csák, B.,**  
627 **Jankovics, I., Szabó, G. and Horváth, G.** (2014). Polarization transition between  
628 sunlit and moonlit skies with possible implications for animal orientation and Viking  
629 navigation: anomalous celestial twilight polarization at partial moon. *Appl. Opt.* **53**,  
630 5193–5204.
- 631 **Batschelet, E.** (1981). *Circular statistics in biology*. New York, NY, USA: Academic  
632 Press.
- 633 **Bech, M., Homberg, U. and Pfeiffer, K.** (2014). Receptive Fields of Locust Brain  
634 Neurons Are Matched to Polarization Patterns of the Sky. *Curr. Biol.* **24**, 1–6.
- 635 **Benn, C. R. and Ellison, S. L.** (1998). Brightness of the night sky over La Palma.  
636 *New Astron. Rev.* **42**, 503–507.
- 637 **Berry, M. V., Dennis, M. R. and Lee, R. L.** (2004). Polarization singularities in the  
638 clear sky. *New J. Phys.* **6**, 1–14.
- 639 **Boheman C. H.** (1860). Coleoptera sammlade af J.A. Wahlberg i sydvestra Afrika.  
640 *Öfvers. Vetenskapsakad. Förh.* Stockholm.
- 641 **Bürkner, P.-C.** (2017). Advanced Bayesian Multilevel Modeling with the R Package  
642 brms. *J. Stat. Softw.* **80**, 1–18.
- 643 **Carpenter, B., Gelman, A., Hoffman, M. D., Lee, D., Goodrich, B., Betancourt,**  
644 **M., Brubaker, M., Guo, J., Li, P. and Riddell, A.** (2017). Stan: A Probabilistic  
645 Programming Language. *J. Stat. Softw.* **76**.
- 646 **Chiou, T.-H., Kleinlogel, S., Cronin, T. W., Caldwell, R., Loeffler, B., Siddiqi, A.,**  
647 **Goldizen, A. and Marshall, N. J.** (2008). Circular polarization vision in a  
648 stomatopod crustacean. *Curr. Biol.* **18**, 1–6.
- 649 **Dacke, M., Nordström, P., Scholtz, C. H. and Warrant, E. J.** (2002). A specialized  
650 dorsal rim area for polarized light detection in the compound eye of the scarab  
651 beetle *Pachysoma striatum*. *J. Comp. Physiol. A* **188**, 211–6.

- 652 **Dacke, M., Byrne, M. J., Baird, E., Scholtz, C. H. and Warrant, E. J.** (2011). How  
653 dim is dim? Precision of the celestial compass in moonlight and sunlight. *Philos.*  
654 *Trans. R. Soc. B Biol. Sci.* **366**, 697–702.
- 655 **Dacke, M., Byrne, M. J., Scholtz, C. H. and Warrant, E. J.** (2004). Lunar  
656 orientation in a beetle. *Proc. R. Soc. B* **271**, 361–365.
- 657 **Dacke, M., Jundi, B., Smolka, J., Byrne, M. and Baird, E.** (2014). The role of the  
658 sun in the celestial compass of dung beetles. *Phil. Trans. R Soc. B* **369**, 20130036
- 659 **Dacke, M., Nilsson, D.-E., Warrant, E. J., Blest, A. D., Land, M. F. and O’Carroll,**  
660 **D. C.** (1999). Built-in polarizers form part of a compass organ in spiders. *Nature*  
661 **401**, 470–474.
- 662 **Dacke, M., Nordström, P. and Scholtz, C. H.** (2003). Twilight orientation to  
663 polarised light in the crepuscular dung beetle *Scarabaeus zambesianus*. *J. Exp.*  
664 *Biol.* **206**, 1535–1543.
- 665 **Dacke, M., Nilsson, D.-E., Scholtz, C. H., Byrne, M. and Warrant, E. J.** (2003).  
666 Insect orientation to polarized moonlight. *Nature* **424**, 33.
- 667 **Egri, Á., Farkas, A., Kriska, G. and Horváth, G.** (2016). Polarization sensitivity in  
668 Collembola: an experimental study of polarotaxis in the water-surface-inhabiting  
669 springtail, *Podura aquatica*. *J. Exp. Biol.* **219**, 2567–2576.
- 670 **el Jundi, B., Foster, J. J., Byrne, M. J., Baird, E. and Dacke, M.** (2015a).  
671 Spectral information as an orientation cue in dung beetles. *Biol. Lett.* **11**, 20150656.
- 672 **el Jundi, B., Warrant, E. J., Byrne, M. J., Khaldy, L., Baird, E., Smolka, J. and**  
673 **Dacke, M.** (2015b). Neural coding underlying the cue preference for celestial  
674 orientation. *PNAS* **112**, 11395–11400.
- 675 **el Jundi, B., Foster, J. J., Khaldy, L., Byrne, M. J., Dacke, M. and Baird, E.**  
676 (2016). A Snapshot-Based Mechanism for Celestial Orientation. *Curr. Biol.* **26**,  
677 1456–1462.
- 678 **el Jundi, B., Smolka, J., Baird, E., Byrne, M. J., and Dacke, M.** (2014). Diurnal  
679 dung beetles use the intensity gradient and the polarization pattern of the sky for  
680 orientation. *J Exp Biol* **217**, 2422–2429.
- 681 **Falchi, F., Cinzano, P., Duriscoe, D., Kyba, C. C. M., Elvidge, C. D., Baugh, K.,**  
682 **Portnov, B. A., Rybnikova, N. A. and Furgoni, R.** (2016). The new world atlas of  
683 artificial night sky brightness. *Sci. Adv.* **2**, e1600377.
- 684 **Foster, J. J., El Jundi, B., Smolka, J., Khaldy, L., Nilsson, D.-E., Byrne, M. J.**  
685 **and Dacke, M.** (2017). Stellar performance : mechanisms underlying Milky Way  
686 orientation in dung beetles. *Phil. Trans. R. Soc. B* **372**, 20160079.
- 687 **Foster, J. J., Smolka, J., Nilsson, D.-E. and Dacke, M.** (2018). How animals  
688 follow the stars. *Proceedings. Biol. Sci.* **285**, 20172322.
- 689 **Foster, J. J., Temple, S. E., How, M. J., Daly, I. M., Sharkey, C. R., Wilby, D. and**  
690 **Roberts, N. W.** (2018). Polarisation vision: overcoming challenges of working with  
691 a property of light we barely see. *Sci. Nat.* **105**, 27.
- 692 **Freas, C. A., Narendra, A., Lemesle, C. and Cheng, K.** (2017). Polarized light use  
693 in the nocturnal bull ant, *Myrmecia midas*. *R. Soc. Open Sci.* **4**, 170598.
- 694 **Frisch, K. von** (1967). *The dance language and orientation of bees*. Cambridge,  
695 MA, US: Harvard University Press.
- 696 **Gál, J., Horváth, G., Barta, A. and Wehner, R.** (2001). Polarization of the moonlit  
697 clear night sky measured by full-sky imaging polarimetry at full Moon: Comparison  
698 of the polarization of moonlit and sunlit skies. *J. Geophys. Res.* **106**, 22647–22653.
- 699 **Glantz, R. M. and Schroeter, J. P.** (2006). Polarization contrast and motion  
700 detection. *J. Comp. Physiol. A* **192**, 905–914.
- 701 **Hegedüs, R., Åkesson, S. and Horváth, G.** (2007). Polarization patterns of thick  
702 clouds: overcast skies have distribution of the angle of polarization similar to that of  
703 clear skies. *J. Opt. Soc. Am. A* **24**, 2347.



- 704 **Henze, M. J. and Labhart, T.** (2007). Haze, clouds and limited sky visibility:  
705 polarotactic orientation of crickets under difficult stimulus conditions. *J. Exp. Biol.*  
706 **210**, 3266–3276.
- 707 **Horváth, G., Barta, A. and Hegedüs, R.** (2014). Polarization of the Sky. In  
708 *Polarized Light in Animal Vision* (ed. Horváth, G.), pp. 367–406. Berlin, Heidelberg:  
709 Springer Berlin Heidelberg.
- 710 **Houpt, J. W. and Bittner, J. L.** (2018). Analyzing thresholds and efficiency with  
711 hierarchical Bayesian logistic regression. *Vision Res.* **148**, 49–58.
- 712 **Johnsen, S., Kelber, A., Warrant, E., Sweeney, A. M., Widder, E. A., Lee, R. L.**  
713 **and Hernández-Andrés, J.** (2006). Crepuscular and nocturnal illumination and its  
714 effects on color perception by the nocturnal hawkmoth *Deilephila elpenor*. *J. Exp.*  
715 *Biol.* **209**, 789–800.
- 716 **Kieffer, H. H. and Stone, T. C.** (2005). The Spectral Irradiance of the Moon.  
717 *Astron. J.* **129**, 2887–2901.
- 718 **Kirwan, J. D.** (2018). Spatial vision in diverse invertebrates. PhD thesis,  
719 Lund University, Lund, Sweden.
- 720 **Knoblauch, K. and Maloney, L. T.** (2012). *Modeling Psychophysical Data in R*.  
721 New York, NY: Springer New York.
- 722 **Kyba, C. C. M., Ruhtz, T., Fischer, J. and Hölker, F.** (2011). Lunar skylight  
723 polarization signal polluted by urban lighting. *J. Geophys. Res.* **116**, D24106.
- 724 **Labhart, T.** (1996). How polarization-sensitive interneurons of crickets perform at  
725 low degrees of polarization. *J. Exp. Biol.* **199**, 1467–1475.
- 726 **Labhart, T.** (1999). How polarization-sensitive interneurons of crickets see the  
727 polarization pattern of the sky: a field study with an opto-electronic model neurone.  
728 *J. Exp. Biol.* **202 (Pt 7)**, 757–70.
- 729 **Labhart, T., Hodel, B. and Valenzuela, I.** (1984). The physiology of the cricket's  
730 compound eye with particular reference to the anatomically specialized dorsal rim  
731 area. *J. Comp. Physiol. A* **155**, 289–296.
- 732 **Menzel, R. and Snyder, A. W.** (1974). Polarised light detection in the bee, *Apis*  
733 *mellifera*. *J. Comp. Physiol.* **88**, 247–270.
- 734 **Palmer, G. and Johnsen, S.** (2015). Downwelling spectral irradiance during  
735 evening twilight as a function of the lunar phase. *Appl. Opt.* **54**, B85.
- 736 **Papi, F. and Pardi, L.** (1963). On the Lunar Orientation of Sandhoppers  
737 (*Amphipoda Talitridae*). *Biol. Bull.* **124**, 97–105.
- 738 **Pfeiffer, K. and Homberg, U.** (2007). Coding of Azimuthal Directions via Time-  
739 Compensated Combination of Celestial Compass Cues. *Curr Biol* **17**, 960–965.
- 740 **Pfeiffer, K., Negrello, M. and Homberg, U.** (2011). Conditional perception under  
741 stimulus ambiguity: polarization- and azimuth-sensitive neurons in the locust brain  
742 are inhibited by low degrees of polarization. *J. Neurophysiol.* **105**, 28–35.
- 743 **Rossel, S. and Wehner, R.** (1984). How bees analyse the polarization patterns in  
744 the sky. *J. Comp. Physiol. A* **154**, 607–615.
- 745 **Schmeling, F., Wakakuwa, M., Tegtmeier, J., Kinoshita, M., Bockhorst, T.,**  
746 **Arikawa, K. and Homberg, U.** (2014). Opsin expression, physiological  
747 characterization and identification of photoreceptor cells in the dorsal rim area and  
748 main retina of the desert locust, *Schistocerca gregaria*. *J. Exp. Biol.* **217**, 3557–  
749 3568.
- 750 **Schmidt-Koenig, K.** (1990). The sun compass. *Experientia* **46**, 336–342.
- 751 **Shurcliff, W. A.** (1955). Haidinger's Brushes and Circularly Polarized Light. *JOSA*  
752 **45**, 399.
- 753 **Smolka, J., Baird, E., el Jundi, B., Reber, T., Byrne, M. J. and Dacke, M.** (2016).  
754 Night sky orientation with diurnal and nocturnal eyes: dim-light adaptations are  
755 critical when the moon is out of sight. *Anim. Behav.* **111**, 127–146.

- 756 **Stavenga, D. G.** (2010). On visual pigment templates and the spectral shape of  
757 invertebrate rhodopsins and metarhodopsins. *J. Comp. Physiol. A Neuroethol.*  
758 *Sensory, Neural, Behav. Physiol.* **196**, 869–878.
- 759 **Strutt, J. W.** (1871). On the Light from the Sky, its Polarization and Colour. *London,*  
760 *Edinburgh Dublin Philos. Mag. J. Sci.* **xxxvii**, 107–120.
- 761 **Tang, J., Zhang, N., Li, D., Wang, F., Zhang, B., Wang, C., Shen, C., Ren, J.,**  
762 **Xue, C. and Liu, J.** (2016). Novel robust skylight compass method based on full-  
763 sky polarization imaging under harsh conditions. *Opt. Express* **24**, 15834.
- 764 **Temple, S. E., Mcgregor, J. E., Miles, C., Graham, L., Miller, J., Buck, J., Scott-**  
765 **Samuel, N. E. and Roberts, N. W.** (2015). Perceiving polarization with the naked  
766 eye: characterization of human polarization sensitivity. *Proc. R. Soc. B* **282**.
- 767 **Templin, R. M., How, M. J., Roberts, N. W., Chiou, T.-H. and Marshall, J.** (2017).  
768 Circularly polarized light detection in stomatopod crustaceans: a comparison of  
769 photoreceptors and possible function in six species. *J. Exp. Biol.* **220**, 3222–3230.
- 770 **Tibbs, A. B., Daly, I. M., Bull, D. R. and Roberts, N. W.** (2018). Noise creates  
771 polarization artefacts. *Bioinspir. Biomim.* **13**, 015005
- 772 **Wang, X., Gao, J., Fan, Z. and Roberts, N. W.** (2016). An analytical model for the  
773 celestial distribution of polarized light, accounting for polarization singularities,  
774 wavelength and atmospheric turbidity. *J. Opt.* **18**, 065601.
- 775 **Warrant, E. J.** (1999). Seeing better at night: Life style, eye design and the  
776 optimum strategy of spatial and temporal summation. *Vis. Res.* **39**, 1611–1630.
- 777 **Wehner, R.** (2001). Polarization vision—a uniform sensory capacity? *J. Exp. Biol.*  
778 **204**, 2589–2596.
- 779 **Zeil, J., Ribi, W. A. and Narendra, A.** (2014). Polarisation vision in ants, bees and  
780 wasps. In *Polarized Light in Animal Vision* (ed. Horváth, G.), pp. 41–60. Berlin,  
781 Heidelberg: Springer Berlin Heidelberg.
- 782

783 Figure 1. **The filter stack used in orientation experiments.** The filter stack is shown  
784 arranged so as to produce (A) the polarized stimuli and (B) the “maximally-polarized”  
785 and “unpolarized” controls. (C) shows the arrangement of the filter stack during  
786 experiments. (A) Unpolarized light from a fluorescent lamp passed through seven  
787 acrylic-mounted fabric diffusers and a polarizer, so that the number of diffusers before  
788 and after the polarizer in the light path determined the degree of polarization of  
789 stimulus light. In the arrangement shown (6 diffusers before the polarizer, 1 diffuser  
790 after the polarizer) stimulus light would have a degree of polarization of 0.32, while if  
791 the whole filter stack were inverted stimulus light would have a degree of polarization  
792 of <0.02 (1 diffuser before the polarizer, 6 diffusers after the polarizer). (B) The addition  
793 of a drafting-paper diffuser ensured that degrees of polarization of 0.99 and  $\approx 0$  could  
794 be produced by one filter stack, depending on whether it was upright (“maximally-  
795 polarized”: as shown) or inverted (“unpolarized”). (C) The filter stack was suspended  
796 12 cm above a 50 cm diameter arena from which the beetle viewed stimulus light  
797 transmitted through it, but not the light from the fluorescent lamp itself, which was  
798 shielded from view by the filter holder’s base (outer casing of the filter stack shown in  
799 cross-section to reveal the filters inside).

800 Figure 2. **Spectral radiance (i) and degree of linear polarization (ii) images of**  
801 **night skies.** Image sets recorded before (A) and after (B) full moon, and under  
802 gibbous moon (C), crescent moon (D), moonless (E) and overcast gibbous moon (F)  
803 conditions in rural South Africa. All images are displayed on a radial azimuth-elevation  
804 grid, with concentric white rings at elevations of 30° and 60° (A i). Azimuth values are  
805 relative to local magnetic north. Radiance images have been linearised and normalised  
806 to their brightest value. Estimated degree of linear polarization is relative to the  
807 colour map at the bottom right of each panel; redder hues indicate high degrees of  
808 polarization, intermediate degrees of polarization are greener hues, and degrees of  
809 polarization approaching zero (*i.e.* unpolarized) are darker blue hues. In (A) the moon  
810 was near the north-western horizon, causing the maximum degree of polarization band  
811 to cross the sky from north-east to south west, at an angular distance of 90° from the  
812 moon itself. In (B) the moon was at 45° elevation to the north, and the band of maximum  
813 degree of polarization ringed the sky at 45° elevation in the south, crossing the horizon  
814 in the east (where it is obscured by trees below 30° elevation) and west. In (C) and (D),  
815 the moon was near the western horizon and the maximum-degree band crossed north-  
816 south and near the zenith. In (E) the moon was too far below the horizon ( $\geq 18^\circ$ ) to  
817 produce measurable lunar skylight. (F) shows an overcast sky lit by a gibbous moon,  
818 for which lunar skylight was not detectable through the thick cloud cover. Bright  
819 moonlight (0–45° elevation to the north-west) enhanced motion artefacts that  
820 artificially inflated degree of polarization estimates in that region. (G) shows histograms  
821 of degrees of polarization measured for each camera pixel at elevations  $>30^\circ$   
822 (excluding vegetation near the horizon). Between the crescent moon (light blue) and  
823 gibbous moon (orange) measurements, the modal degree of polarization (indicated by  
824 black arrows) increased as a function of moon fullness from 0.23 to 0.65. *N.B.* For the  
825 waning gibbous moon, the upper mode (0.62) is indicated, rather than the lower mode  
826 (0.02) which corresponds to the region around the moon itself. (A), (B), (C) and (E)  
827 were measured near Vryburg, and (D) and (F) were measured near Bela-Bela.

828 Figure 3. **Orientation change for stimulus light with different degrees of**  
829 **linear polarization.** Differences in heading between two sequential trials, between  
830 which the stimulus’ angle of polarization (AoP) was rotated by 90°, shown relative to  
831 stimulus angle of polarization (*i.e.*  $\text{AoP}_{\text{East}} - \text{AoP}_{\text{North}} - 90^\circ$ ). Each point represents  
832 relative orientation change for one individual, for one pair of trials, and points are  
833 colour coded to correspond to the colours used to plot degree of linear polarization for  
834 lunar skylight (see Fig. 2). Degree of linear polarization is shown in bold type to the left  
835 of each circle. The (A) shows the unpolarized condition for each experiment ( $\text{DoLP} \approx 0$ )  
836 and (B) shows the ‘polarized’ conditions, increasing in degree of linear polarization  
837 from (B<sub>i</sub>) ( $\text{DoLP} = 0.04$ ) to (B<sub>iv</sub>) ( $\text{DoLP} = 0.99$ ). The axial mean vectors and  
838 mean directions  $\pm$  one circular standard deviation are shown as red arrows and red  
839 errors bars respectively. For degrees of polarization of 0.32 (B<sub>iii</sub>) and 0.99 (B<sub>iv</sub>), axial

840 orientation differs significantly from the corresponding unpolarized controls ( $A_{iii}$  and  
841  $A_{iv}$ ).

842 **Figure 4. A fitted model for the relationship between degree of polarization and**  
843 **orientation precision.** White points show the mean vector lengths for the “polarized”  
844 stimuli and blue points indicate the mean vector lengths for the controls performed on  
845 the same night (pooled in the model). The red line indicates the fitted regression line  
846 (mean estimate) of the model for polarized stimuli. The red shaded region indicates its  
847 95% credible interval. The blue line shows the fitted line for a model including only the  
848 control condition ( $DoLP < 0.02$ ) and the blue shaded area indicates its 95% credible  
849 interval. Model estimates of circular concentration parameter  $\kappa$  have been transformed  
850 to mean vector length  $\rho$  for comparison with the mean vectors for each condition. The  
851 overlap of the credible intervals of the model for the all data (red shaded area) and the  
852 model for the controls (blue area) indicate that orientation performance may be aided  
853 by polarization for degrees of polarization as low as 0.06.

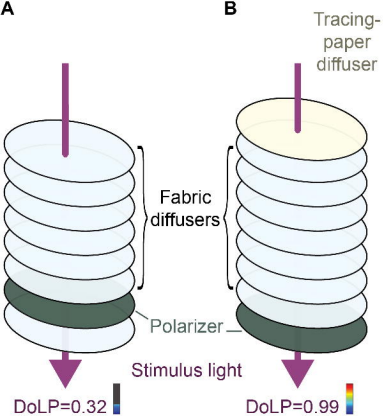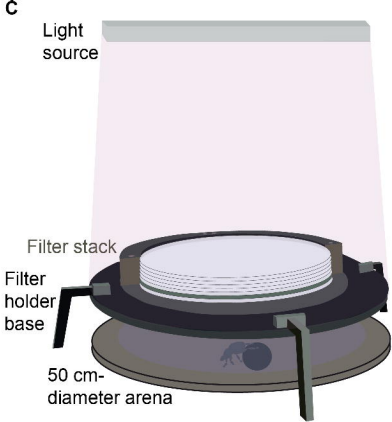

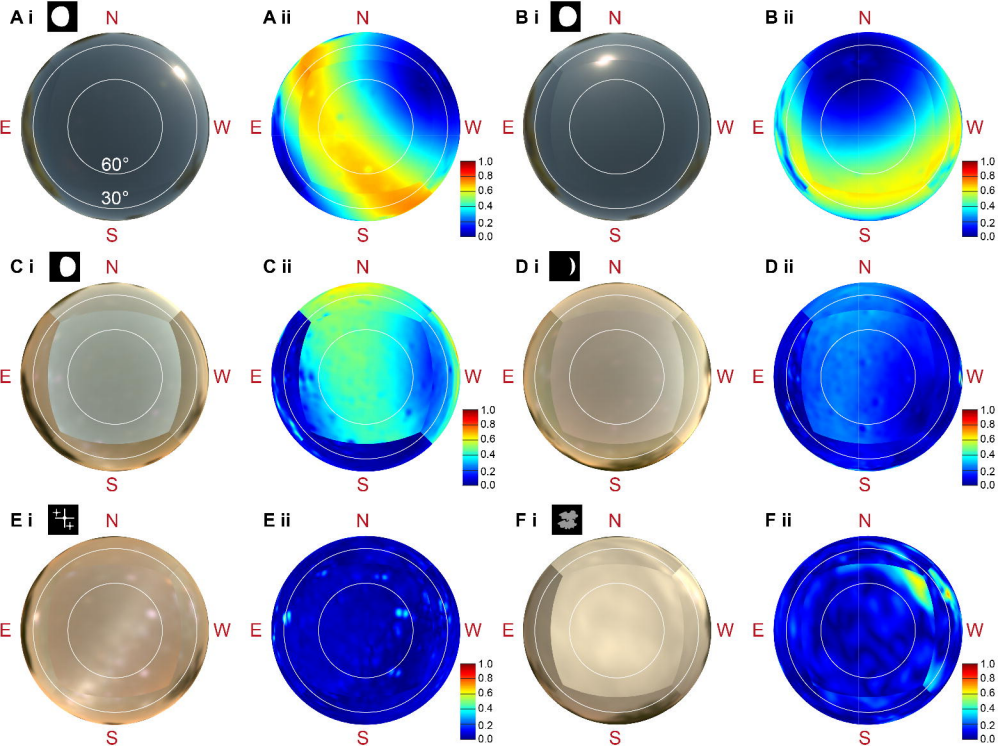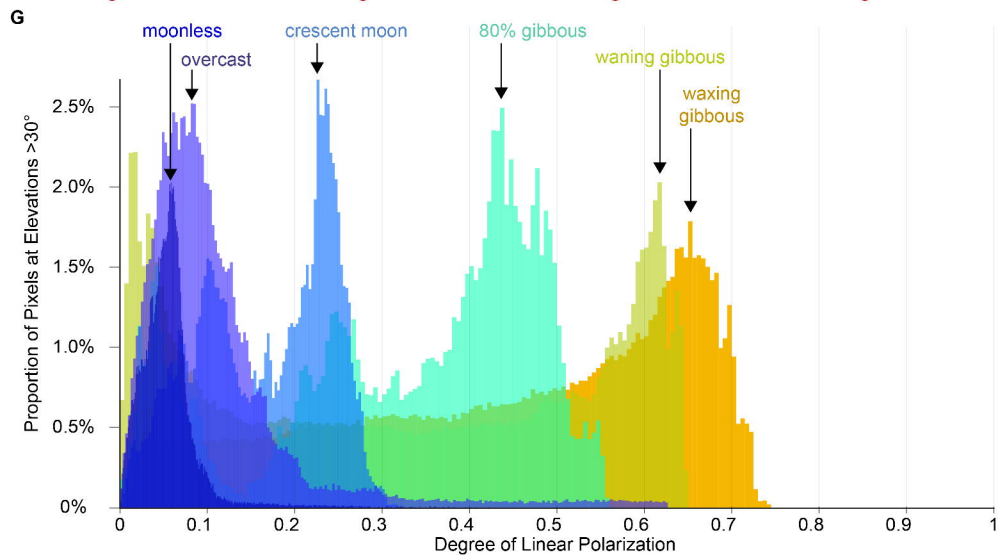

**A i**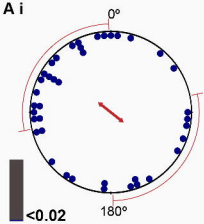**A ii**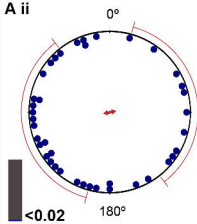**A iii**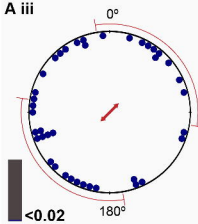**A iv**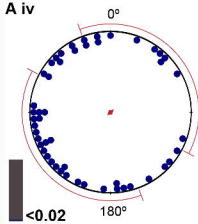**B i**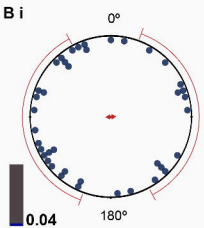**B ii**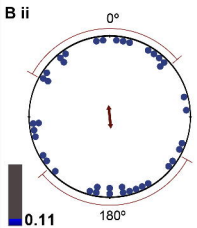**B iii**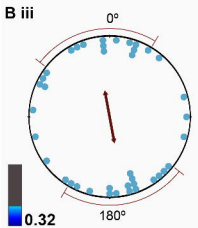**B iv**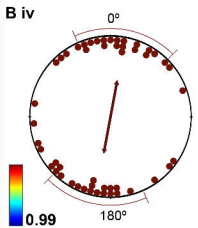

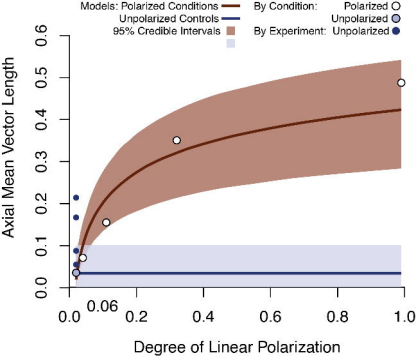

Source: https://www.biorxiv.org/content/10.1101/366583v1.full.pdf
